# Supplementary material for: Prenatal Allergen Exposure Perturbs Sexual Differentiation and Programs Lifelong Changes in Adult Social and Sexual Behavior
Source: PubMed Central journal article supplement (PMC6423032; doi:10.1038/s41598-019-41258-2), 2019-03-18
Supplement: 41598_2019_41258_MOESM1_ESM.pdf [file 41598_2019_41258_MOESM1_ESM.pdf]

**Title:** Prenatal Allergen Exposure Perturbs Sexual Differentiation and Programs Lifelong Changes in Adult Social and Sexual Behavior

**Authors:** Kathryn M. Lenz, Lindsay A. Pickett, Christopher L. Wright, Anabel Galan, Margaret M. McCarthy

**Supplemental Figure 1**

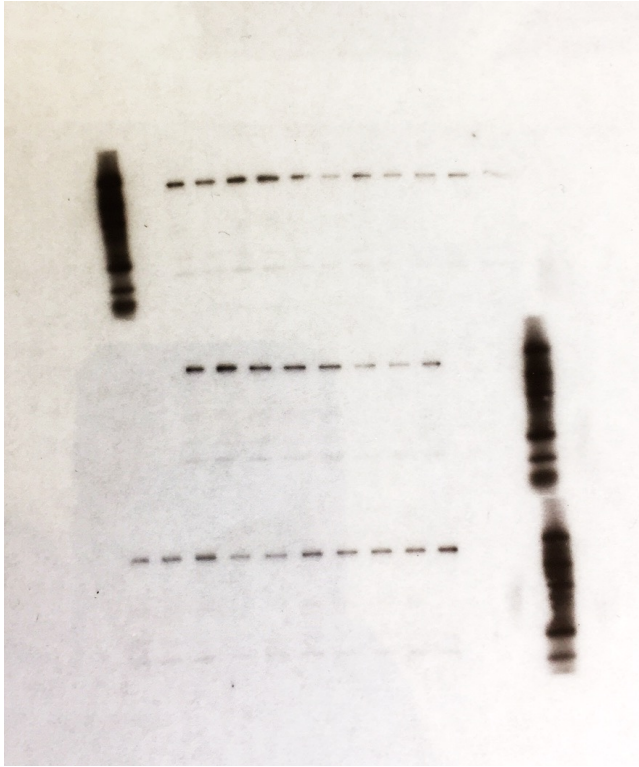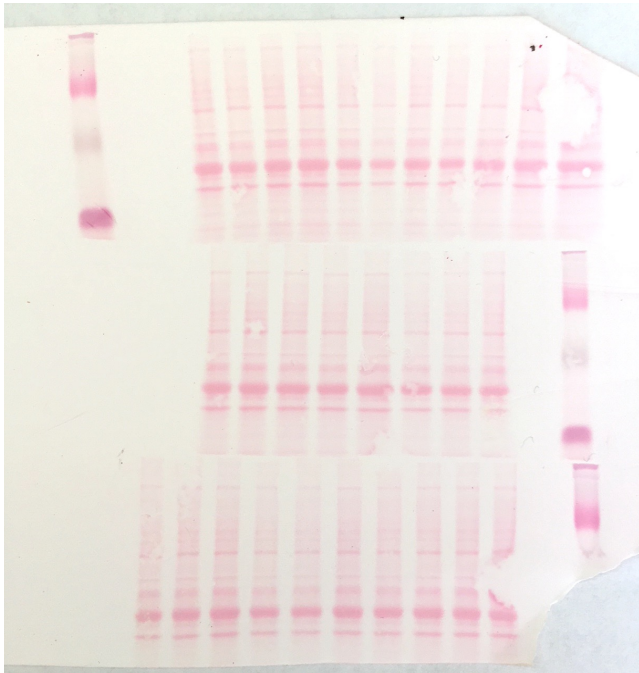

**Supplemental figure 1:** Full length western blot for spinophilin (upper) and Ponceau staining of the same membrane (lower) for data in Figure 4. The first 8 lanes were used for representative images in Figure 4.
